# Supplementary material
Source: PubMed Central journal article supplement (PMC3836674)
Supplement: NIHMS473083-supplement-SFig1.pdf [file NIHMS473083-supplement-SFig1.pdf]

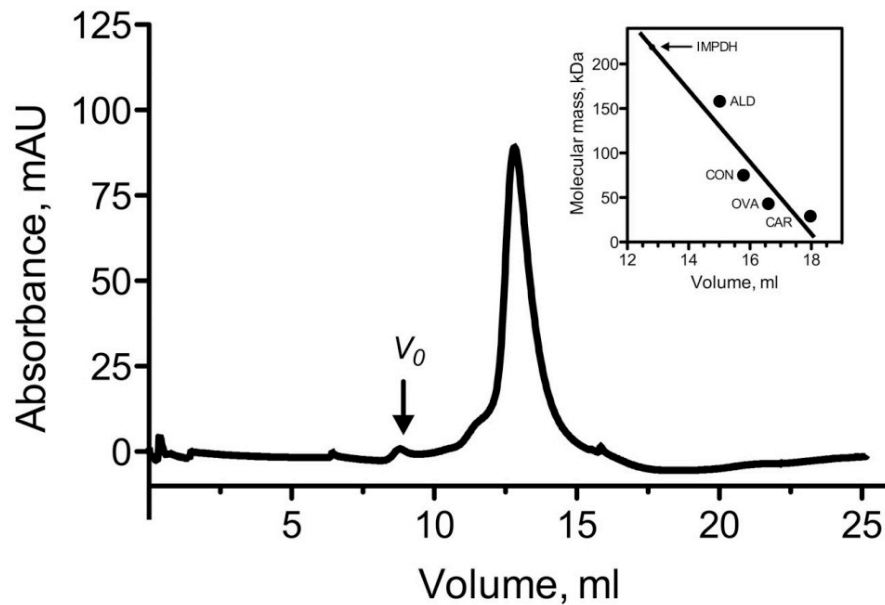

Figure S1. Size exclusion chromatography of the *B. anthracis* IMPDH. The protein was chromatographed on a Superdex 200 HR 10/30 column equilibrated with a buffer containing 20 mM Hepes pH 8.0, 150 mM KCl, and 2 mM DTT at 25°C. The column was calibrated with aldolase (ALD, 158 kDa), conalbumin (CON, 75 kDa), ovalbumin (OVA, 43 kDa) and carbonic anhydrase (CAR, 29 kDa). The protein eluted at 12.8 ml, which corresponds to a molecular mass of 219 kDa, indicating that the *B.a anthracis* IMPDH exists as a tetramer in solution (calculated mass of a tetramer is 217 kDa).
